# Supplementary material for: Simulating the impact on health of internalising the cost of carbon in food prices combined with a tax on sugar-sweetened beverages
Source: BMC Public Health. 2016 Feb 3;16:107. doi: 10.1186/s12889-016-2723-8 (PMC4738773; doi:10.1186/s12889-016-2723-8)
Supplement: Supplementary file 1 — Tabular data. Sheet 1 shows the matrix of own- and cross-price elasticities for the 32 food and drink categories and sheet 2 shows indicates whether the elasticities are statistically significant or not (1 indicates statistical significance). Elasticity estimates refer to price rise for item listed in top row with respect to quantity change for those listed in first column. (XLS 53 kb) [file 12889_2016_2723_MOESM1_ESM.xls]

## Sheet: Sheet1
	Milk	Other milk products	Cream	Cheese	Eggs	Pork	Beef	Poultry	Lamb	Other meat	Fish	Bread, cereals, flour	Cakes, buns, pastries, biscuits	Animal fats	Vegetable fats	Sugar and preserves	Sweets	Tinned and dried fruit and nuts	Fresh fruit	Potatoes	Canned veg	Fresh veg	Fruit juice	Soft drinks, concentrated, low calorie	Soft drinks, not concentrated, low calorie	Soft drinks, concentrated, not low calorie	Soft drinks, not concentrated, not low calorie	Non-coffee drinks	Coffee drinks	Beer	Wine	Other alcohol
Milk	-0.841595	0.279079	0.0585432	0.159966	0.140956	0.00118643	0.000303682	0.000544201	2.3943e-05	0.00115518	0.000511106	-0.023902	-0.0120368	-0.00163998	-0.00462023	-7.08352e-05	-0.00111477	-0.000183527	-0.00395226	0.00185674	0.00234162	0.00391245	0.000128025	7.24041e-05	0.000262983	0.000119601	0.000516091	0.000328475	0.000297424	0.00820294	0.0184951	0.00314103
Other milk products	0.166079	-0.867791	-0.0465242	0.0797499	-0.00293615	0.00672077	0.00172027	0.00308275	0.000135631	0.00654375	0.00289527	-0.135494	-0.0682332	-0.00929659	-0.0261907	-0.000401545	-0.00631929	-0.00104114	-0.022421	0.0105204	0.0132678	0.0221683	0.000724007	0.00040946	0.00148723	0.000676366	0.0029186	0.00185759	0.00168199	0.0464785	0.104795	0.0177973
Cream	0.48651	0.0405632	-0.849776	0.188352	0.16655	0.000146466	3.74899e-05	6.71824e-05	2.9558e-06	0.000142608	6.30967e-05	-0.00295262	-0.00148691	-0.000202588	-0.000570738	-8.7503e-06	-0.000137707	-2.22278e-05	-0.000478675	0.000229961	0.000290014	0.000484566	1.53782e-05	8.69711e-06	3.15893e-05	1.43663e-05	6.19924e-05	3.9456e-05	3.57262e-05	0.00101385	0.00228593	0.000388221
Cheese	0.261706	0.242395	0.000485524	-0.754757	0.135388	0.00123649	0.000316497	0.000567167	2.49535e-05	0.00120393	0.000532675	-0.0249101	-0.0125445	-0.00170915	-0.00481509	-7.38228e-05	-0.00116178	-0.000191132	-0.00411603	0.00193446	0.00243964	0.00407624	0.00013322	7.53422e-05	0.000273655	0.000124454	0.000537034	0.000341804	0.000309493	0.00854355	0.019263	0.00327146
Eggs	0.418467	-0.0577697	0.0685561	0.2661	-1.14828	0.0071768	0.001837	0.00329193	0.000144834	0.00698777	0.00309173	-0.144845	-0.0729424	-0.00993821	-0.0279983	-0.000429258	-0.00675542	-0.00111621	-0.0240377	0.011243	0.0141791	0.0236909	0.000778518	0.000440289	0.0015992	0.00072729	0.00313835	0.00199745	0.00180863	0.0496721	0.111995	0.0190202
Pork	0.000917125	0.000474842	3.72055e-06	0.000349786	5.6469e-05	-1.09852	0.160994	0.207233	0.213804	0.226291	0.11234	-0.0446482	-0.0224843	-0.00306343	-0.00863043	-0.000132318	-0.00208234	0.00013145	0.00283078	-0.000437089	-0.000551233	-0.00092102	0.00028825	0.000163019	0.000592111	0.000269282	0.00116199	0.000739566	0.000669654	-0.00213222	-0.0048075	-0.000816462
Beef	0.00357292	0.00184988	1.44944e-05	0.00136269	0.000219991	0.2814	-0.761319	0.10153	-0.182659	0.201576	0.0963251	-0.173827	-0.0875373	-0.0119267	-0.0336005	-0.000515148	-0.0081071	0.000512281	0.011032	-0.00170188	-0.00214632	-0.00358615	0.00112096	0.000633956	0.00230263	0.0010472	0.00451879	0.00287606	0.00260418	-0.00831614	-0.0187503	-0.00318438
Poultry	0.00140561	0.000727757	5.70222e-06	0.000536092	8.6546e-05	0.300346	0.0844242	-0.978189	0.0463904	0.334331	0.0889273	-0.0682884	-0.0343893	-0.00468546	-0.0132001	-0.000202377	-0.0031849	0.000201045	0.0043295	-0.000668969	-0.000843668	-0.00140963	0.000440411	0.000249073	0.000904674	0.000411431	0.00177538	0.00112997	0.00102315	-0.00326554	-0.00736279	-0.00125043
Lamb	0.00088484	0.000458127	3.58958e-06	0.000337473	5.44812e-05	0.559447	-0.053775	0.188219	-1.31167	0.660912	0.0597908	-0.0434231	-0.0218674	-0.00297938	-0.00839363	-0.000128687	-0.00202521	0.000126741	0.00272937	-0.000425906	-0.000537129	-0.000897454	0.000279989	0.000158347	0.000575143	0.000261565	0.00112869	0.000718371	0.000650463	-0.00207292	-0.00467378	-0.000793752
Other meat	0.000166847	8.63853e-05	6.76858e-07	6.36346e-05	1.02731e-05	0.23426	0.137492	0.250513	0.349714	-1.19042	0.15845	-0.00810839	-0.0040833	-0.000556339	-0.00156734	-2.40298e-05	-0.000378167	2.39251e-05	0.000515228	-7.9665e-05	-0.000100469	-0.000167868	5.23589e-05	2.96115e-05	0.000107554	4.89136e-05	0.000211068	0.000134338	0.000121639	-0.000387511	-0.000873717	-0.000148384
Fish	0.00427669	0.00221426	1.73495e-05	0.0016311	0.000263323	0.075482	0.0437935	0.0357085	-0.0791062	0.150993	-0.646733	-0.207234	-0.104361	-0.0142189	-0.0400581	-0.000614154	-0.0096652	0.00061652	0.0132768	-0.00201288	-0.00253854	-0.00424148	0.00133327	0.000754027	0.00273875	0.00124554	0.00537465	0.00342078	0.00309741	-0.00988777	-0.0222939	-0.00378618
Bread, cereals, flour	-0.00503494	-0.00260684	-2.04255e-05	-0.0019203	-0.00031001	-0.0041506	-0.0010624	-0.00190384	-8.37625e-05	-0.00404128	-0.00178806	-0.787882	0.12586	0.281524	0.749034	0.0257128	0.149396	-0.000951119	-0.0204823	-0.00406436	-0.00512575	-0.00856429	-0.000755053	-0.000427018	-0.001551	-0.000705369	-0.00304376	-0.00193725	-0.00175412	0.0062709	0.0141389	0.00240123
Cakes, buns, pastries, biscuits	-0.00660928	-0.00342196	-2.68122e-05	-0.00252074	-0.000406946	-0.00544823	-0.00139455	-0.00249905	-0.00010995	-0.00530473	-0.00234707	0.0787455	-0.947779	0.361969	0.975668	0.0363891	0.194145	-0.00124845	-0.0268855	-0.00533555	-0.00672891	-0.0112429	-0.000991175	-0.000560556	-0.00203603	-0.000925953	-0.0039956	-0.00254307	-0.00230267	0.00823126	0.0185589	0.00315188
Animal fats	-0.00560407	-0.00290151	-2.27343e-05	-0.00213736	-0.000345053	-0.00461878	-0.00118224	-0.00211859	-9.32108e-05	-0.00449713	-0.00198975	0.832678	0.44185	-0.84405	-0.000225418	-0.0689893	0.0736414	-0.00105827	-0.0227898	-0.00452433	-0.00570584	-0.00953352	-0.000840457	-0.000475319	-0.00172643	-0.000785154	-0.00338804	-0.00215637	-0.00195253	0.00698124	0.0157405	0.00267323
Vegetable fats	-0.00691142	-0.00357839	-2.80379e-05	-0.00263598	-0.000425548	-0.00569624	-0.00145803	-0.00261281	-0.000114955	-0.00554621	-0.00245391	1.01648	0.534411	-0.0698474	-0.97153	-0.0620739	0.103828	-0.00130535	-0.0281108	-0.00558008	-0.0070373	-0.0117582	-0.0010369	-0.000586416	-0.00212996	-0.000968669	-0.00417993	-0.00266038	-0.00240889	0.00861013	0.0194132	0.00329696
Sugar and preserves	-0.000219621	-0.000113709	-8.90948e-07	-8.37622e-05	-1.35225e-05	-0.000180292	-4.61481e-05	-8.26979e-05	-3.63843e-06	-0.000175543	-7.76687e-05	0.552273	0.497967	-0.0829844	-0.0332141	-0.310563	-0.12281	-4.12525e-05	-0.000888373	-0.00017846	-0.000225063	-0.000376044	-3.28805e-05	-1.85955e-05	-6.75418e-05	-3.07169e-05	-0.000132547	-8.43619e-05	-7.63871e-05	0.00027453	0.00061898	0.000105122
Sweets	-0.0121498	-0.0062906	-4.92889e-05	-0.00463388	-0.000748088	-0.0100301	-0.00256733	-0.00460069	-0.000202415	-0.0097659	-0.00432091	0.688306	0.180951	0.287597	0.966183	-0.0862129	-0.858883	-0.00229678	-0.0494612	-0.0097988	-0.0123577	-0.0206477	-0.0018205	-0.00102958	-0.0037396	-0.00170071	-0.00733877	-0.00467088	-0.00422934	0.0150922	0.0340282	0.00577904
Tinned and dried fruit and nuts	-0.00359328	-0.00186042	-1.4577e-05	-0.00137046	-0.000221245	0.00410878	0.0010517	0.00188465	8.29185e-05	0.00400056	0.00177004	-0.0912753	-0.0459653	-0.00626265	-0.0176434	-0.000270501	-0.00425699	-0.860418	0.918999	0.00672873	0.00848591	0.0141786	0.0037454	0.0021182	0.00769364	0.00349894	0.0150984	0.0096096	0.0087012	-0.0124679	-0.0281113	-0.00477416
Fresh fruit	-0.00433212	-0.00224296	-1.75744e-05	-0.00165225	-0.000266737	0.00496526	0.00127093	0.00227751	0.000100203	0.00483448	0.00213901	-0.110195	-0.0554928	-0.00756075	-0.0213005	-0.000326569	-0.00513936	0.160461	-0.711997	0.00813273	0.0102566	0.017137	0.0045252	0.00255922	0.00929549	0.00422744	0.0182419	0.0116104	0.0105128	-0.0150592	-0.0339537	-0.00576639
Potatoes	0.00498036	0.00257859	2.02041e-05	0.00189948	0.00030665	0.000615682	0.000157592	0.000282407	1.2425e-05	0.000599466	0.000265233	-0.0438447	-0.0220797	-0.0030083	-0.00847512	-0.000129937	-0.00204487	0.000701214	0.0151007	-0.813331	0.241933	0.404211	-0.000269982	-0.000152688	-0.000554586	-0.000252217	-0.00108835	-0.000692696	-0.000627215	0.00361289	0.00814594	0.00138343
Canned veg	0.0047742	0.00247185	1.93678e-05	0.00182085	0.000293956	0.000591103	0.000151301	0.000271133	1.19289e-05	0.000575534	0.000254644	-0.0420222	-0.0211619	-0.00288326	-0.00812283	-0.000124536	-0.00195987	0.000672705	0.0144867	0.223583	-0.835286	0.429816	-0.000257905	-0.000145858	-0.000529778	-0.000240935	-0.00103966	-0.00066171	-0.000599158	0.00346141	0.00780441	0.00132543
Fresh veg	0.0103194	0.00534286	4.18631e-05	0.00393575	0.000635382	0.00127737	0.000326961	0.000585917	2.57784e-05	0.00124373	0.000550285	-0.0908254	-0.0457387	-0.00623178	-0.0175564	-0.000269167	-0.004236	0.00145354	0.0313021	0.22056	0.263875	-0.998749	-0.000559334	-0.00031633	-0.00114896	-0.000522529	-0.00225478	-0.00143509	-0.00129943	0.00747866	0.0168621	0.0028637
Fruit juice	0.00655713	0.00339496	2.66007e-05	0.00250085	0.000403734	0.00862506	0.0022077	0.00395623	0.000174061	0.00839789	0.00371564	-0.0346108	-0.0174296	-0.00237474	-0.00669022	-0.000102571	-0.00161421	0.00289245	0.0622889	0.000967261	0.00121986	0.00203818	-0.723914	-0.115751	0.0638669	-0.0712693	0.302417	0.31163	0.265484	0.0294475	0.0663949	0.0112759
Soft drinks, concentrated, low calorie	0.0135732	0.00702755	5.50632e-05	0.00517675	0.000835728	0.0178725	0.00457471	0.00819794	0.000360682	0.0174018	0.00769939	-0.0717943	-0.0361548	-0.004926	-0.0138777	-0.000212767	-0.00334841	0.00599453	0.129092	0.00199699	0.00251849	0.00420799	0.504231	-1.43678	-0.728771	0.193899	-0.374373	1.16681	1.04928	0.0610187	0.137578	0.023365
Soft drinks, not concentrated, low calorie	0.00537272	0.00278173	2.17958e-05	0.00204912	0.000330808	0.00706882	0.00180936	0.00324239	0.000142655	0.00688263	0.00304521	-0.0283881	-0.014296	-0.00194779	-0.00548739	-8.41302e-05	-0.00132399	0.0023708	0.0510552	0.000789481	0.00099565	0.00166357	0.152247	-0.160072	-0.834635	-0.0202484	0.0870164	0.415294	0.368808	0.024134	0.0544146	0.00924127
Soft drinks, concentrated, not low calorie	0.000489152	0.000253259	1.98437e-06	0.00018656	3.0118e-05	0.000645181	0.000165143	0.000295938	1.30203e-05	0.000628187	0.000277941	-0.00260367	-0.00131118	-0.000178645	-0.000503285	-7.71615e-06	-0.000121432	0.00021614	0.00465457	7.19888e-05	9.07884e-05	0.000151692	-0.057082	0.270235	0.167323	-0.769657	0.247387	-0.0315728	-0.0358163	0.0022034	0.00496799	0.000843718
Soft drinks, not concentrated, not low calorie	0.00391264	0.00202578	1.58726e-05	0.00149226	0.000240909	0.00514964	0.00131812	0.00236209	0.000103924	0.005014	0.00221844	-0.0206632	-0.0104058	-0.00141776	-0.00399418	-6.12369e-05	-0.000963712	0.00172611	0.0371717	0.000576235	0.000726717	0.00121422	0.0896768	0.0799986	0.139444	-0.0668874	-0.828476	0.281729	0.247869	0.017592	0.0396645	0.00673625
Non-coffee drinks	0.0055145	0.00285514	2.2371e-05	0.0021032	0.000339538	0.00726083	0.00185851	0.00333047	0.00014653	0.00706959	0.00312793	-0.0291728	-0.0146911	-0.00200162	-0.00563906	-8.64556e-05	-0.00136059	0.00243589	0.052457	0.000810158	0.00102173	0.00170714	0.244175	0.09912	0.354647	0.162401	0.694013	-0.969173	-0.0681833	0.0247951	0.0559052	0.00949442
Coffee drinks	0.00309263	0.00160121	1.25461e-05	0.00117951	0.000190419	0.0040723	0.00104236	0.00186792	8.21825e-05	0.00396504	0.00175433	-0.0163657	-0.00824158	-0.00112289	-0.00316346	-4.85008e-05	-0.000763278	0.00136619	0.0294208	0.000454459	0.00057314	0.000957622	0.111414	0.0564892	0.199806	0.0919811	0.390144	0.111316	-0.693135	0.0139068	0.0313554	0.00532511
Beer	0.00169407	0.000877106	6.87242e-06	0.000646108	0.000104307	-0.0137729	-0.00352535	-0.00631747	-0.000277948	-0.0134101	-0.00593328	-0.0603958	-0.0304147	-0.00414392	-0.0116744	-0.000178987	-0.0028168	-0.0029024	-0.0625032	-0.00680603	-0.00858339	-0.0143414	1.93113e-05	1.09215e-05	3.96686e-05	1.80406e-05	7.78475e-05	4.95473e-05	4.48636e-05	-1.10631	0.711793	0.161733
Wine	0.00197464	0.00102237	8.01061e-06	0.000753115	0.000121582	-0.0160276	-0.00410248	-0.0073517	-0.00032345	-0.0156055	-0.00690461	-0.0703011	-0.0354029	-0.00482355	-0.0135891	-0.000208342	-0.00327877	-0.00337758	-0.0727362	-0.007918	-0.00998575	-0.0166845	2.37357e-05	1.34237e-05	4.8757e-05	2.21739e-05	9.5683e-05	6.0899e-05	5.51422e-05	0.431445	-0.811775	-0.0243218
Other alcohol	0.00590734	0.00305853	2.39646e-05	0.00225303	0.000363726	-0.0479317	-0.0122688	-0.0219858	-0.000967301	-0.0466692	-0.0206487	-0.210206	-0.105857	-0.0144228	-0.0406324	-0.000622958	-0.00980377	-0.0100993	-0.217488	-0.0236729	-0.029855	-0.0498828	6.797e-05	3.84403e-05	0.000139621	6.34974e-05	0.000273999	0.000174391	0.000157906	0.197349	-0.241793	-0.838174

## Sheet: Sheet2
	Milk	Other milk products	Cream	Cheese	Eggs	Pork	Beef	Poultry	Lamb	Other meat	Fish	Bread/cereals/Flour	Cakes, buns, pastries, biscuits	Animal fats	Vegetable fats	Sugar and preserves	Sweets	Tinned and dried fruit and nuts	Fresh fruit	Potatoes	Canned veg	Fresh veg	Fruit juice	Soft drinks, concentrated, low calorie	Soft drinks, not concentrated, low calorie	Soft drinks, concentrated, not low calorie	Soft drinks, not concentrated, not low calorie	Non-coffee drinks	Coffee drinks	Beer	Wine	Other alcohol
Milk	1	1	1	1	1	0	0	0	0	0	0	1	1	1	1	1	1	0	0	1	1	1	0	0	0	0	0	0	0	1	1	1
Other milk products	1	1	1	1	0	0	0	0	0	0	0	1	1	1	1	1	1	0	0	1	1	1	0	0	0	0	0	0	0	1	1	1
Cream	1	0	1	1	0	0	0	0	0	0	0	1	1	1	1	1	1	0	0	1	1	1	0	0	0	0	0	0	0	1	1	1
Cheese	1	1	0	1	1	0	0	0	0	0	0	1	1	1	1	1	1	0	0	1	1	1	0	0	0	0	0	0	0	1	1	1
Eggs	1	0	0	1	1	0	0	0	0	0	0	1	1	1	1	1	1	0	0	1	1	1	0	0	0	0	0	0	0	1	1	1
Pork	0	0	0	0	0	1	1	1	1	1	1	1	1	1	1	1	1	0	0	0	0	0	0	0	0	0	0	0	0	0	0	0
Beef	0	0	0	0	0	1	1	1	1	1	1	1	1	1	1	1	1	0	0	0	0	0	0	0	0	0	0	0	0	0	0	0
Poultry	0	0	0	0	0	1	1	1	0	1	1	1	1	1	1	1	1	0	0	0	0	0	0	0	0	0	0	0	0	0	0	0
Lamb	0	0	0	0	0	1	0	1	1	1	0	1	1	1	1	1	1	0	0	0	0	0	0	0	0	0	0	0	0	0	0	0
Other meat	0	0	0	0	0	1	1	1	1	1	1	1	1	1	1	1	1	0	0	0	0	0	0	0	0	0	0	0	0	0	0	0
Fish	0	0	0	0	0	0	0	0	0	1	1	1	1	1	1	1	1	0	0	0	0	0	0	0	0	0	0	0	0	0	0	0
Bread/cereals/Flour	1	1	1	1	1	1	1	1	1	1	1	1	1	1	1	1	1	1	1	1	1	1	1	1	1	1	1	1	1	1	1	1
Cakes, buns, pastries, biscuits	1	1	1	1	1	1	1	1	1	1	1	1	1	1	1	1	1	1	1	1	1	1	1	1	1	1	1	1	1	1	1	1
Animal fats	1	1	1	1	1	1	1	1	1	1	1	1	1	1	0	1	1	1	1	1	1	1	1	1	1	1	1	1	1	1	1	1
Vegetable fats	1	1	1	1	1	1	1	1	1	1	1	1	1	1	1	1	1	1	1	1	1	1	1	1	1	1	1	1	1	1	1	1
Sugar and preserves	1	1	1	1	1	1	1	1	1	1	1	1	1	0	0	1	0	1	1	1	1	1	1	1	1	1	1	1	1	1	1	1
Sweets	1	1	1	1	1	1	1	1	1	1	1	1	0	1	1	1	1	1	1	1	1	1	1	1	1	1	1	1	1	1	1	1
Tinned and dried fruit and nuts	0	0	0	0	0	0	0	0	0	0	0	1	1	1	1	1	1	1	1	1	1	1	1	1	1	1	1	1	1	0	0	0
Fresh fruit	0	0	0	0	0	0	0	0	0	0	0	1	1	1	1	1	1	1	1	1	1	1	1	1	1	1	1	1	1	0	0	0
Potatoes	1	1	1	1	1	0	0	0	0	0	0	1	1	1	1	1	1	1	1	1	1	1	0	0	0	0	0	0	0	0	0	0
Canned veg	1	1	1	1	1	0	0	0	0	0	0	1	1	1	1	1	1	1	1	1	1	1	0	0	0	0	0	0	0	0	0	0
Fresh veg	1	1	1	1	1	0	0	0	0	0	0	1	1	1	1	1	1	1	1	1	1	1	0	0	0	0	0	0	0	0	0	0
Fruit juice	0	0	0	0	0	1	1	1	1	1	1	0	0	0	0	0	0	1	1	0	0	0	1	1	0	1	1	1	1	1	1	1
Soft drinks, concentrated, low calorie	0	0	0	0	0	1	1	1	1	1	1	0	0	0	0	0	0	1	1	0	0	0	1	1	1	1	1	1	1	1	1	1
Soft drinks, not concentrated, low calorie	0	0	0	0	0	1	1	1	1	1	1	0	0	0	0	0	0	1	1	0	0	0	1	1	1	0	0	1	1	1	1	1
Soft drinks, concentrated, not low calorie	0	0	0	0	0	1	1	1	1	1	1	0	0	0	0	0	0	1	1	0	0	0	1	1	1	1	1	0	0	1	1	1
Soft drinks, not concentrated, not low calorie	0	0	0	0	0	1	1	1	1	1	1	0	0	0	0	0	0	1	1	0	0	0	1	0	1	1	1	1	1	1	1	1
Non-coffee drinks	0	0	0	0	0	1	1	1	1	1	1	0	0	0	0	0	0	1	1	0	0	0	1	1	1	1	1	1	1	1	1	1
Coffee drinks	0	0	0	0	0	1	1	1	1	1	1	0	0	0	0	0	0	1	1	0	0	0	1	1	1	1	1	1	1	1	1	1
Beer	0	0	0	0	0	1	1	1	1	1	1	1	1	1	1	1	1	1	1	1	1	1	0	0	0	0	0	0	0	1	1	1
Wine	0	0	0	0	0	1	1	1	1	1	1	1	1	1	1	1	1	1	1	1	1	1	0	0	0	0	0	0	0	1	1	0
Other alcohol	0	0	0	0	0	1	1	1	1	1	1	1	1	1	1	1	1	1	1	1	1	1	0	0	0	0	0	0	0	1	1	1
